# Supplementary material for: Passive Monitoring of Short-Acting Beta-Agonist Use via Digital Platform in Patients With Chronic Obstructive Pulmonary Disease: Quality Improvement Retrospective Analysis
Source: PubMed Central journal article supplement (PMC7010108; doi:10.2196/13286), 2019-10-23
Supplement: formative_v3i4e13286_app1.pdf [file formative_v3i4e13286_app1.pdf]

Multimedia Appendix 1. Changes in short-acting beta-agonist use.

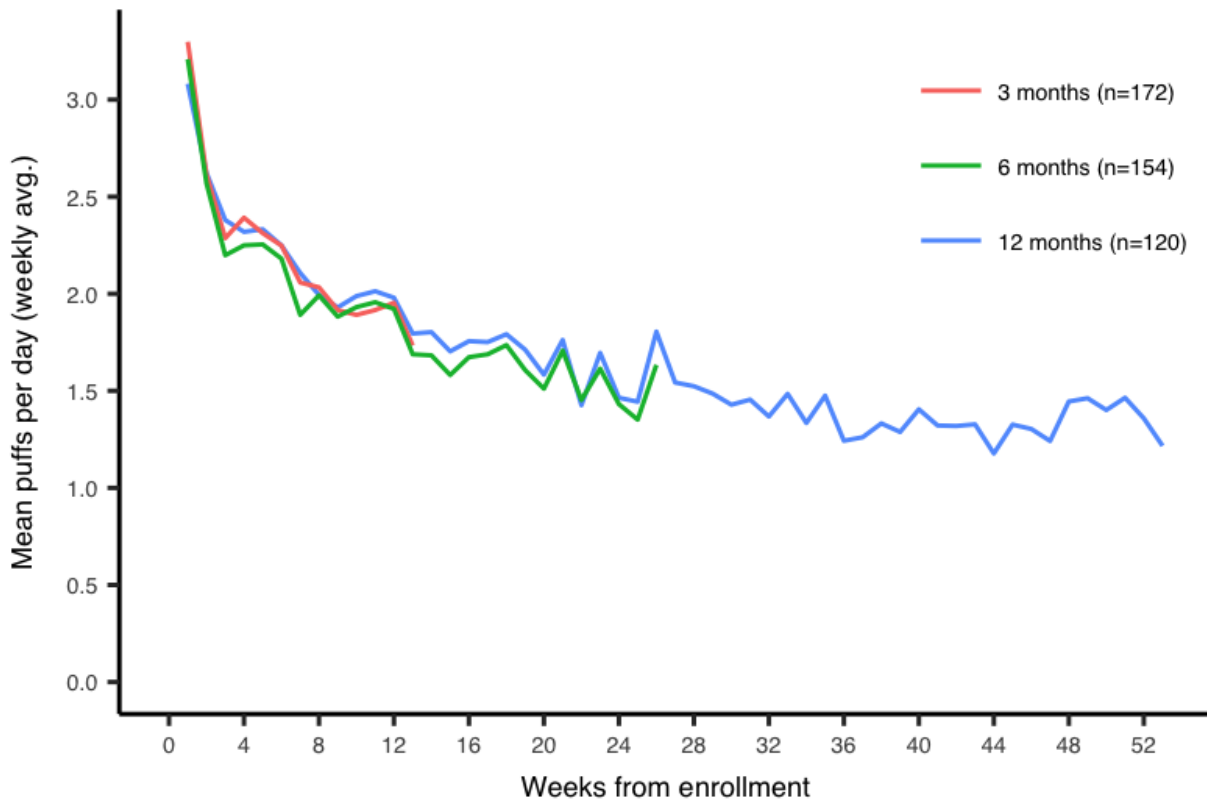

**Figure S1.** Mean daily SABA use at 3, 6, and 12 months

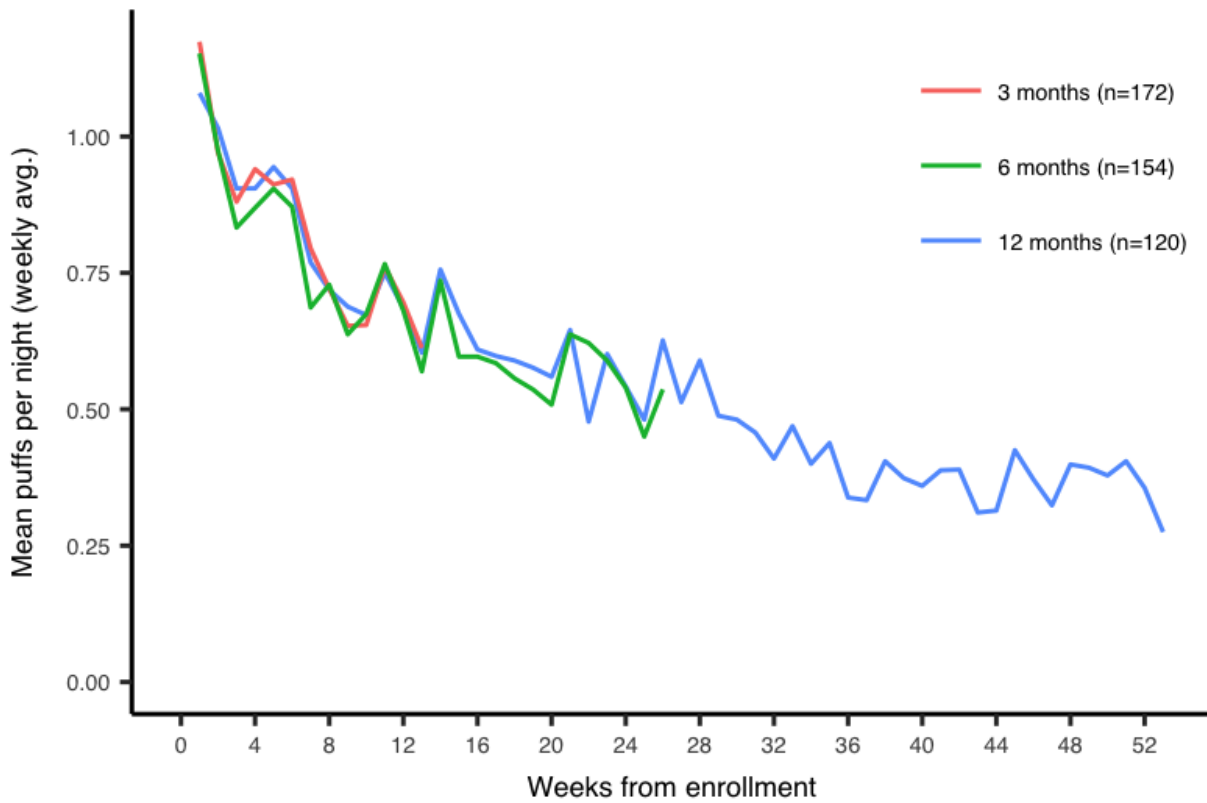

**Figure S2.** Nighttime SABA use at 3, 6, and 12 months

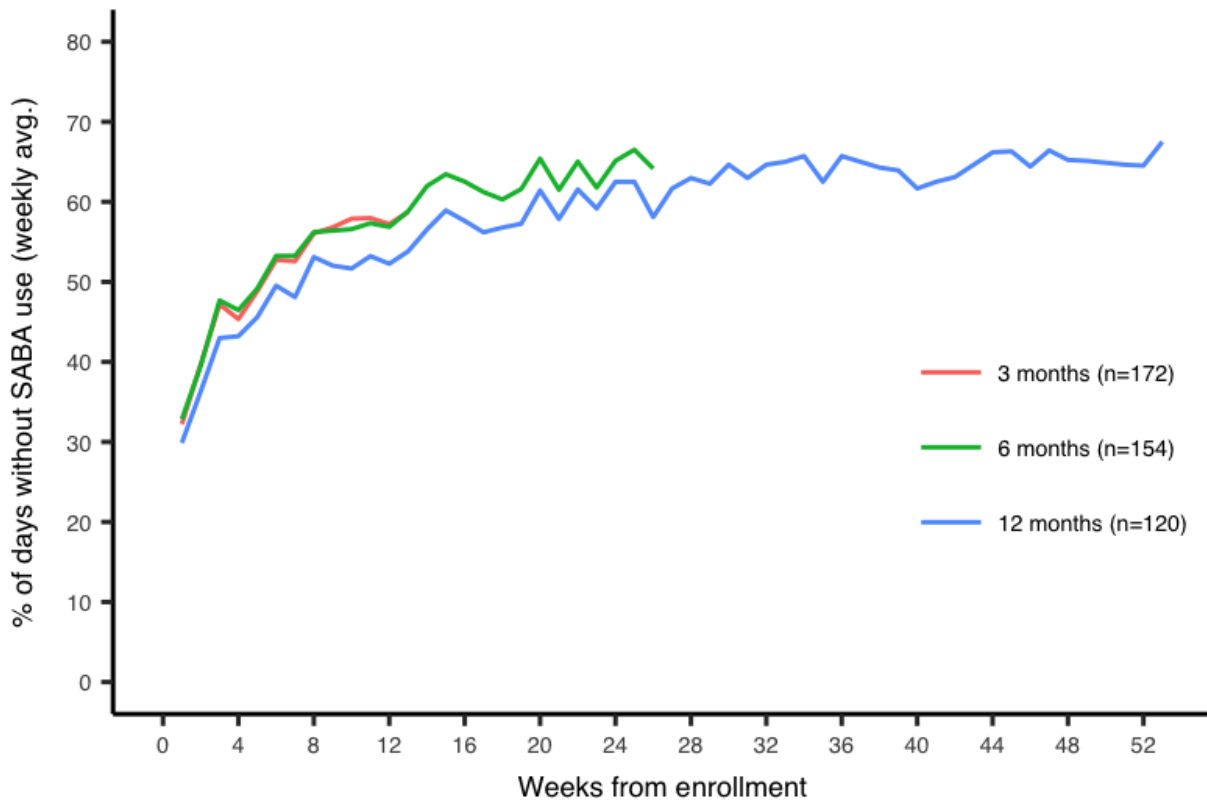

**Figure S3.** Percent of SABA-free days at 3, 6, and 12 months
